# Supplementary material for: Resolved Hyperfine at L-band for High-Spin CoEDTA, A Model for Co Sites in Proteins
Source: MDPI journal article supplement (doi:10.3390/ijms20102385), 2019-05-14
Supplement: s1 [file s1]

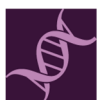

# Resolved Hyperfine at L-band for High Spin CoEDTA, A Model for Co Sites in Proteins

William E. Antholine

Department of Biophysics, Medical College of Wisconsin, Milwaukee, WI 53226, USA; [wantholi@mcw.edu](mailto:wantholi@mcw.edu); Tel.: 414-955-4032

Received: 16 April 2019; Accepted: 10 May 2019; Published: date

## Supplemental Figure

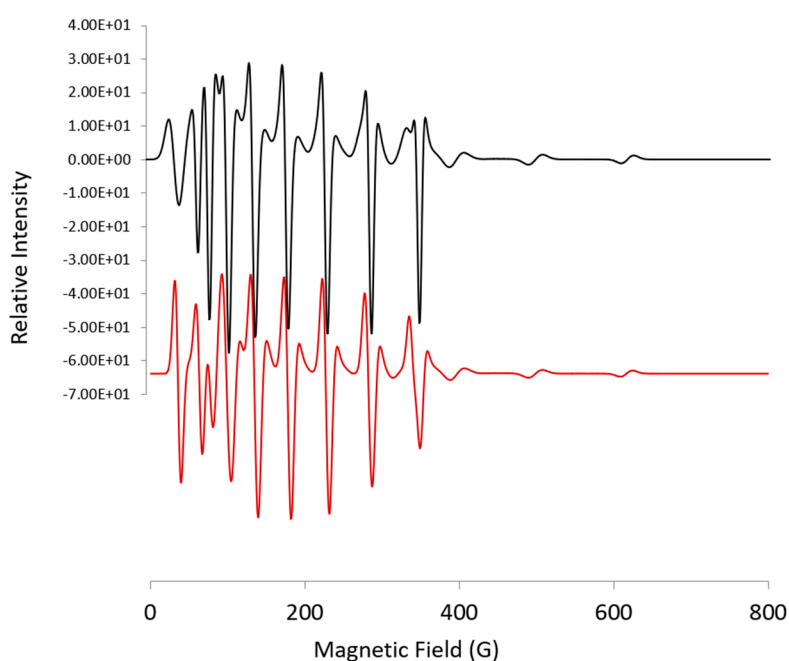

**Figure S1.** Simulated L-band spectra:  $g = [5, 4.31, 2.14]$ ;  $A = [300, 24, 162]$ ;  $mwFreq = 1.37$  GHz;  $HStrain = [100, 25, 50]$  black trace, cone-shaped lines dominate;  $HStrain = [50, 50, 50]$  red trace, S-shaped lines dominate.

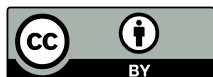

© 2019 by the authors. Submitted for possible open access publication under the terms and conditions of the Creative Commons Attribution (CC BY) license (<http://creativecommons.org/licenses/by/4.0/>).
